# Supplementary material for: Conversion from Standard-Release Tacrolimus to MeltDose® Tacrolimus (LCPT) Improves Renal Function after Liver Transplantation
Source: PubMed Central journal article supplement (PMC7356524; doi:10.3390/jcm9061654), 2020-06-01
Supplement: jcm-09-01654-s001.pdf [file jcm-09-01654-s001.pdf]

# Conversion from Standard-Release Tacrolimus to MeltDose® Tacrolimus (LCPT) Improves Renal Function after Liver Transplantation

Johannes von Einsiedel, Gerold Thölking, Christian Wilms, Elena Vorona, Arne Bokemeyer, Hartmut H. Schmidt, Iyad Kabar and Anna Hüsing-Kabar

**Table S1.** Glomerular filtration rate (eGFR; mL/min/1.73 m<sup>2</sup>) over time.

| Time point      | LCPT<br>mean ± SD | Standard-release Tac<br>mean ± SD | p-value |
|-----------------|-------------------|-----------------------------------|---------|
| t-3             | 66.9 ± 19.0       | 70.6 ± 19.6                       | 0.321   |
| t <sub>0</sub>  | 65.3 ± 21.1       | 70.6 ± 19.3                       | 0.157   |
| t <sub>3</sub>  | 67.5 ± 21.4       | 68.1 ± 20.8                       | 0.886   |
| t <sub>6</sub>  | 67.5 ± 20.1       | 70.2 ± 18.7                       | 0.479   |
| t <sub>9</sub>  | 69.1 ± 20.6       | 65.6 ± 20.2                       | 0.399   |
| t <sub>12</sub> | 70.9 ± 18.1       | 66.3 ± 21.0                       | 0.216   |

LCPT, once-daily MeltDose® tacrolimus; t-3 to t<sub>12</sub>, evaluation time point (months); SD, standard deviation. p-values from t-test.

**Table S2.** Univariate and multivariate analysis of variance on eGFR at 12 months relative to baseline (study onset; t<sub>0</sub>).

|                                                 | Univariate analysis |        |       |         | Multivariate analysis |        |       |         |
|-------------------------------------------------|---------------------|--------|-------|---------|-----------------------|--------|-------|---------|
|                                                 | Estimate            | 95% CI |       | p-value | Estimate              | 95% CI |       | p-value |
|                                                 |                     | lower  | upper |         |                       | lower  | upper |         |
| Sex (male vs. female)                           | -2.72               | -6.40  | 0.95  | 0.145   | -1.00                 | -6.98  | 4.98  | 0.437   |
| Age at study onset (per year)                   | -0.06               | -0.19  | 0.06  | 0.325   | N/A                   | N/A    | N/A   | N/A     |
| Study group (LCPT vs. standard-release Tac)     | 9.00                | 5.71   | 12.26 | <0.001  | 9.00                  | 0.78   | 17.23 | <0.001  |
| Tac formulation at study onset (IR- vs. ER-Tac) | 3.37                | -0.25  | 7.00  | 0.068   | 2.13                  | -5.75  | 10.00 | 0.801   |
| Time between LTx and study onset (months)       | -0.02               | -0.05  | 0.01  | 0.263   | N/A                   | N/A    | N/A   | N/A     |
| Arterial hypertension (yes vs. no)              | 0.36                | -3.40  | 4.11  | 0.852   | N/A                   | N/A    | N/A   | N/A     |
| Diabetes (yes vs. no)                           | -2.02               | -6.05  | 2.00  | 0.322   | N/A                   | N/A    | N/A   | N/A     |
| WIT (minutes)                                   | -0.04               | -0.25  | 0.17  | 0.695   | N/A                   | N/A    | N/A   | N/A     |

Regression coefficient estimates as well as lower and upper 95% confidence limits (95% CI) regarding eGFR 12 months after study onset relative to baseline (t<sub>0</sub>). A negative estimated value for continuous variables describes a decrease per unit and for categorical variables, that the first category has a deteriorated eGFR. LCPT, once-daily MeltDose® tacrolimus; IR-Tac, immediate-release tacrolimus; ER-Tac, extended-release tacrolimus; LTx, liver transplantation; WIT, warm ischemic time.
